# Supplementary material
Source: PubMed Central journal article supplement (PMC4670759)

Supplementary Figure 1: Kaplan-Meier estimate of freedom from rejection endpoint and infection endpoint (FDCC)

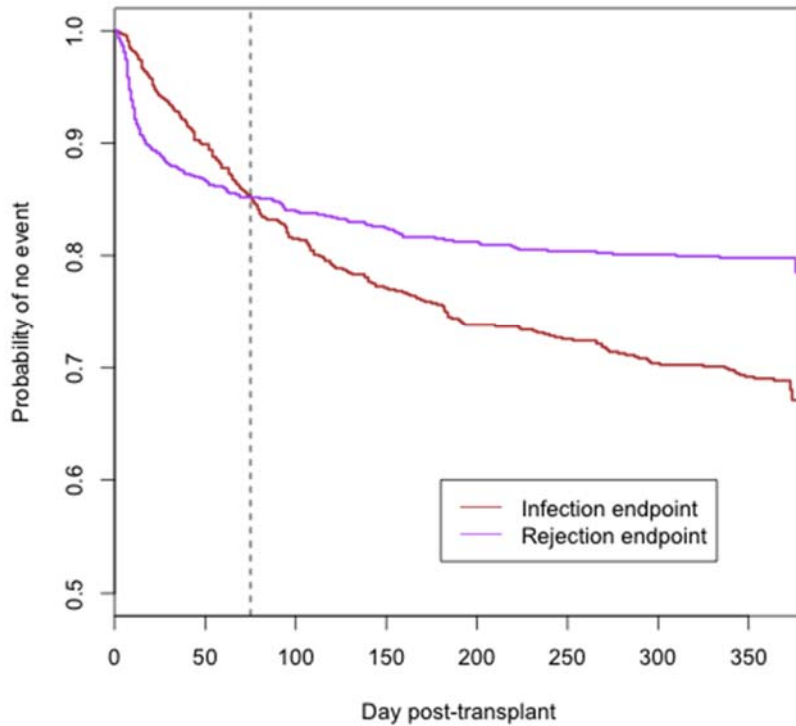

Supplement: CJN.01790215_CJN01790215SupplementaryData.pdf [file CJN.01790215_CJN01790215SupplementaryData.pdf]
